# Supplementary material
Source: PubMed Central journal article supplement (PMC2922534)
Supplement: 1006738107_pnas.1006738107_SI.pdf [file 1006738107_pnas.1006738107_SI.pdf]

# Supporting Information

Khare et al. 10.1073/pnas.1006738107

## SI Text

**Materials and Methods. Cloning, expression, and protein purification.** DNA encoding the Hal domain (CurA residues 1600–1919, 320 amino acids, 37.1 kDa) was amplified from plasmid pET28b::Cur Hal encoding CurA residues 1600–1930 (1), using primers for ligation-independent cloning (Table S2). The amplified product was cloned into the pMCSG7 vector (2) to create pMCSG7::Hal. To prepare wild-type Hal, *Escherichia coli* BL21(DE3) cells were transformed with pMCSG7::Hal, grown at 37 °C in LB medium to an OD<sub>600</sub> of 0.8, transferred to 18 °C, induced with 0.4 mM IPTG, grown for 18 h, harvested, and lysed by ultrasonication on ice. Soluble protein was bound to a HisTrap Ni<sup>2+</sup> column (GE Healthcare), washed with Buffer A (100 mM Tris pH 8.0, 500 mM NaCl) containing 5 mM imidazole, and eluted by a linear gradient of 5 mM–500 mM imidazole in Buffer A. Purified Hal was gel filtered on Superdex 200 column (GE healthcare) equilibrated with 10 mM Tris pH 8.0, 25 mM NaCl, 3 mM  $\alpha$ KG, and reconstituted by addition of 0.25 mM (NH<sub>4</sub>)<sub>2</sub>Fe(SO<sub>4</sub>)<sub>2</sub>. Hal eluted with an apparent molecular mass of 80 kDa, corresponding to a dimer, and was concentrated to 10 mg/mL and stored at –80 °C. Selenomethionyl (SeMet) Hal was produced and purified as for the wild type, except that cells of *E. coli* strain B834(DE3), a methionine auxotroph, were transformed with pMCSG7::Hal and grown in SeMet minimal media (Molecular Dimensions). SeMet Hal protein was concentrated to 7 mg/mL and stored at –80 °C. Mutant proteins were generated by site directed mutagenesis of pMCSG7::Hal using primers listed in Table S2 and produced as for the wild type through the nickel affinity chromatography step (Fig. S5). Fractions containing Hal were pooled, concentrated, and dialyzed against 10 mM Tris pH 7.8, 50 mM NaCl, 10% glycerol. The mutant proteins were reconstituted with 3 mM  $\alpha$ KG and freshly prepared 0.25 mM (NH<sub>4</sub>)<sub>2</sub>Fe(SO<sub>4</sub>)<sub>2</sub>.

**Crystallization and data collection.** Crystals of four forms were obtained at 20 °C by the sitting drop vapor diffusion method from the protein stock solutions described above. Crystal form I (apo Hal) grew from a 1:1 mixture of protein stock and reservoir solution (200 mM sodium citrate, 20% PEG 3350). Crystals were cryoprotected by quick passage through a solution containing reservoir solution with 10% (v/v) glycerol. Crystals of form II (holo Hal) grew from a 1:1 mixture of protein and reservoir solution (4.0 M sodium formate) and were cryoprotected in the mother liquor supplemented with 15% glycerol (v/v). Crystal form III was obtained out of a mixture of equal volume of Hal and the precipitant (100 mM sodium fluoride and 18% PEG 3350). Crystal form IV was obtained by replacing  $\alpha$ KG with 3 mM sodium succinate during protein purification and crystals grew under conditions similar to form II. Wild-type and SeMet Hal crystallized in form I under identical conditions. The unbuffered crystallization mixtures had measured pH in the range of 8–9. All crystals were flash frozen in liquid nitrogen. All diffraction data were collected at 100 K on beamline 23ID-D (GM/CA CAT) at the Advanced Photon Source (APS). For structure determination, a 2.6-Å single-wavelength anomalous diffraction (SAD) dataset was collected from a crystal of SeMet Hal at the energy of peak absorption above the Se K edge ( $\lambda = 0.9794$  Å). A 2.2-Å dataset from a crystal of wild-type Hal (form II) was collected at a wavelength of 0.9793 Å. The presence of Fe in form II crystals was confirmed by recording fluorescence spectra of crystals using an excitation energy of 12.66 keV. Data were integrated and scaled with program HKL2000 (3). A summary of the data statistics for crystal form I (apo Hal,  $I_{23}$ , 1 dimer per asymmetric unit), crystal form II (holo

Hal,  $P_{4_32_12}$ , one polypeptide per asymmetric unit, dimer formed by crystallographic symmetry), crystal form III (holo Hal,  $P_{2_1}$ , 1 dimer per asymmetric unit) and crystal form IV ( $P_{2_12_12_1}$ , 1 dimer per asymmetric unit) is given in Table S1.

**Structure determination and refinement.** The structure was solved by SAD using SeMet Hal in crystal form I. 12 of 14 expected Se positions were located based on the Bijvoet differences in the SAD dataset using SOLVE (4) and the resulting experimental map was improved by density modification using RESOLVE (5), both programs running within the PHENIX suite (6). A partial model was built with the program RESOLVE. Manual adjustment and rebuilding of the model was done using COOT (7). All excepting the two C-terminal residues were visible in two or more crystal structures (Fig. S1). Crystallographic refinement was carried out using both PHENIX and Refmac5 (8). Although Hal was reconstituted with (NH<sub>4</sub>)<sub>2</sub>Fe(SO<sub>4</sub>)<sub>2</sub> and  $\alpha$ KG prior to crystallization, citrate in the crystallization solution chelated Fe<sup>3+</sup> ( $K_{\text{stability}} = 11.85$  (9)), accounting for the lack of iron in the form I structure.

The structure in crystal form II was solved by molecular replacement using the model from crystal form I after deletion of 11 residues encoded by the vector preceding the natural Hal sequence. In the active site of the form II structure, the position of iron and  $\alpha$ KG could be seen clearly in different electron density maps (Fig 2A and Fig. S2A). Fluorescence scans at the iron K edge confirmed the presence of iron. Although Hal was reconstituted with ferrous iron, Fe<sup>3+</sup> is assumed to be the bound species because Hal was crystallized under aerobic conditions. During refinement additional positive density appeared in the  $F_o - F_c$  electron density map at the position of a modeled water molecule near the Fe<sup>3+</sup>. The large peak suggested the presence of a more electron dense species than water (Fig S2A). A chloride ion coordinating Fe<sup>3+</sup> was modeled in the electron density. Another positive density within coordination distance of the Fe<sup>3+</sup> was assigned to formate, which was present in the crystallization solution.

The structure in crystal form III (two polypeptides per asymmetric unit) was solved readily by molecular replacement using one subunit from the form I structure and the other from the form II structure. Crystal form IV, related to form II, was solved from the form II structure. Iron was missing from the form IV structure, apparently due to chelation by succinate ( $K_{\text{stability}} = 7.49$  (9)) in the crystallization solution. Statistics for all four crystal structures are summarized in Table S1. All crystallographic models were validated with MolProbity (10), structure similarity searches were done with DALI (11), sequences were aligned with Clustal (12), subunit interfaces were quantitated with PISA (13), and figures were prepared using Pymol (<http://www.pymol.org>).

**Halogenation assay.** The Hal reaction, in a 110- $\mu$ L mixture containing 5  $\mu$ M Hal, 10 mM Tris pH 7.8, 100  $\mu$ M fresh Fe(NH<sub>4</sub>)<sub>2</sub>(SO<sub>4</sub>)<sub>2</sub>, 25  $\mu$ M (S)-HMG ACP and 1 mM  $\alpha$ KG, was initiated by addition of enzyme, incubated at 24 °C for 10 min, and quenched by addition of 20  $\mu$ L formic acid. Aliquots were analyzed by reverse phase HPLC using a Source 15RPC column (GE Healthcare) with a linear gradient from 30%–70% CH<sub>3</sub>CN. Fractions containing substrate (S)-HMG ACP and product Cl-(S)-HMG ACP, which eluted together, were pooled and analyzed by FTICR-MS and infrared multiphoton dissociation (IRMPD).

**Fourier transform ion cyclotron resonance mass spectrometry (FTICR-MS) analysis.** Samples were prepared for FTICR-MS analysis as



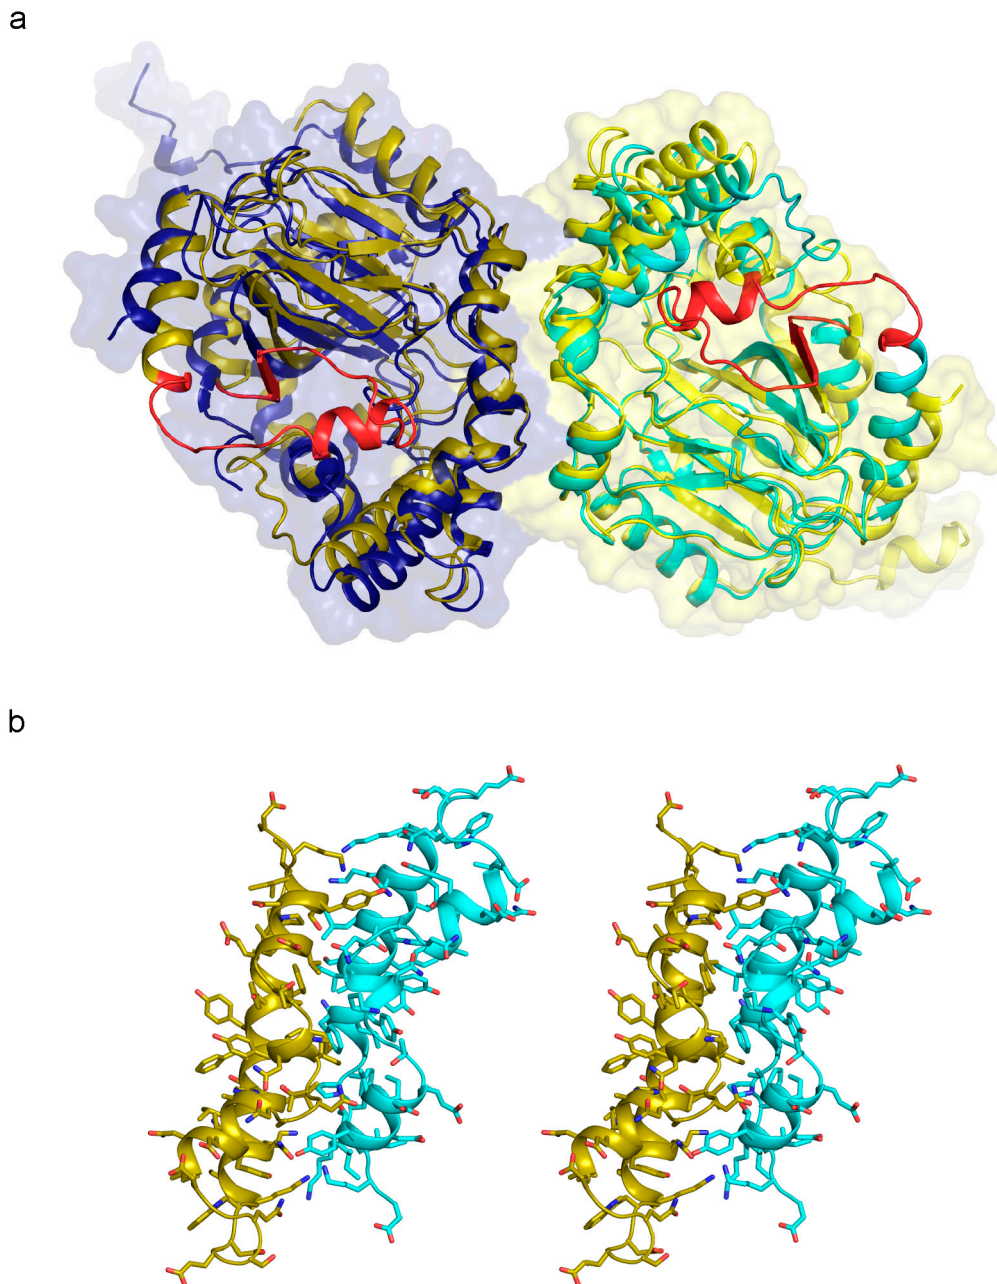

**Fig. S1.** Cur Hal dimer interface. (A) Superposition of open-form and closed-form Hal dimer. Open-form Hal from crystal form I (blue monomer at left and yellow monomer at right) is shown with closed-form Hal from crystal form II (yellow monomer at left and cyan monomer at right with active-site lid in red). The transparent surface for the open form shows shape complementarity of monomer surfaces in the interface. The superposition is based on the core of the subunits on the right. (B) Side chain packing in the dimer interface. Interacting regions for the closed-form dimer (subunits in yellow and cyan) are shown in stereo with side chains in stick form (blue N, red O, C colored as the helices). The view in both A and B is along the dimer axis.







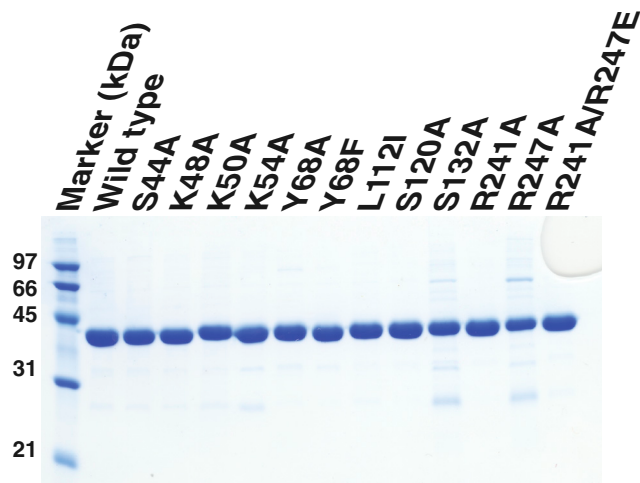

**Fig. S5.** Purity of wild-type and mutant Hal proteins. For activity assays, Hal proteins were purified by nickel affinity chromatography. Fractions containing Hal were pooled, concentrated, and dialyzed against 10 mM Tris pH 7.8, 50 mM NaCl, 10% glycerol. The figure shows SDS PAGE analysis of purified proteins, including molecular weight markers in the left-most lane.
